# Supplementary material
Source: PubMed Central journal article supplement (PMC7940551)
Supplement: NIHMS1640419-supplement-Supporting_information.pdf [file NIHMS1640419-supplement-Supporting_information.pdf]

## Supplementary material for

# Histatin 5 variant reduces *Candida albicans* biofilm viability and inhibits biofilm formation

Parisa Moghaddam-Taaheri<sup>1</sup>, Jesse A. Leissa<sup>2</sup>, Haleigh B. Eppler<sup>1,3</sup>, Christopher M. Jewell<sup>1,3,4</sup>, and Amy J. Karlsson<sup>1,2\*</sup>

<sup>1</sup>Fischell Department of Bioengineering, University of Maryland, College Park, MD

<sup>2</sup>Department of Chemical and Biomolecular Engineering, University of Maryland, College Park, MD

<sup>3</sup>Biological Sciences Graduate Program, University of Maryland, College Park, MD

<sup>4</sup>United States Department of Veterans Affairs, VA Maryland Health Care System, Baltimore, MD

\*Correspondence:

Amy J. Karlsson

Department of Chemical and Biomolecular Engineering

University of Maryland

Email: [ajkarl@umd.edu](mailto:ajkarl@umd.edu)

## Contents

|                                                                                             |        |
|---------------------------------------------------------------------------------------------|--------|
| Supplementary Table S1. Parameter values for fitting model to data in Figures 1 and 2 ..... | Page 2 |
| Supplementary Figure S1. Model fit to data in Figures 1 and 2 .....                         | 2      |
| Supplementary Table S2. Results of t-tests for data in Figure 1A (Planktonic).....          | 2      |
| Supplementary Table S3. Results of t-tests for data in Figure 1B (Biofilm – preformed)..... | 3      |
| Supplementary Table S4. Results of t-tests for data in Figure 2A (Biofilm – formation)..... | 3      |

**Supplementary Table S1.** Values of model parameters for model fits to data in Figures 1A (Planktonic), 1B (Biofilm – Preformed), and 2A (Biofilm – Formation).

| Peptide    | Parameter <sup>a</sup> | Fitted parameter value (95% confidence interval) |                              |                             |
|------------|------------------------|--------------------------------------------------|------------------------------|-----------------------------|
|            |                        | Planktonic                                       | Biofilm – Preformed          | Biofilm – Formation         |
| Histatin 5 | $EC_{50}$              | 6.989 $\mu$ M (4.285 to 11.40)                   | 0.9428 mM (0.7849 to 1.132)  | 0.8602 mM (0.7118 to 1.039) |
|            | $n_H$                  | 1.422 (0.5315 to 2.313)                          | 1.722 (1.261 to 2.183)       | 1.605 (1.186 to 2.023)      |
|            | $Y_{top}$              | 87.05 % (75.63 to 98.46)                         | 92.63 % (84.64 to 100.6)     | 84.11 % (75.36 to 92.86)    |
|            | $Y_{bottom}$           | -24.98 % (-49.04 to -0.9153)                     | 6.13 % (3.005 to 9.254)      | -11.76 % (-15.31 to -8.200) |
| K11R-K17R  | $EC_{50}$              | 6.728 $\mu$ M (5.854 to 7.732)                   | 0.3409 mM (0.2724 to 0.4266) | 0.8657 mM (0.5549 to 1.351) |
|            | $n_H$                  | 1.982 (1.498 to 2.467)                           | 1.264 (0.9012 to 1.626)      | 1.057 (0.6459 to 1.469)     |
|            | $Y_{top}$              | 96.47 % (93.19 to 99.75)                         | 85.72 % (79.78 to 91.66)     | 110.5 % (89.47 to 131.6)    |
|            | $Y_{bottom}$           | 3.618 % (-2.406 to 9.641)                        | 10.74 % (5.917 to 15.56)     | 1.03 % (-5.835 to 7.896)    |

<sup>a</sup> See methods section for model details and parameter definitions.

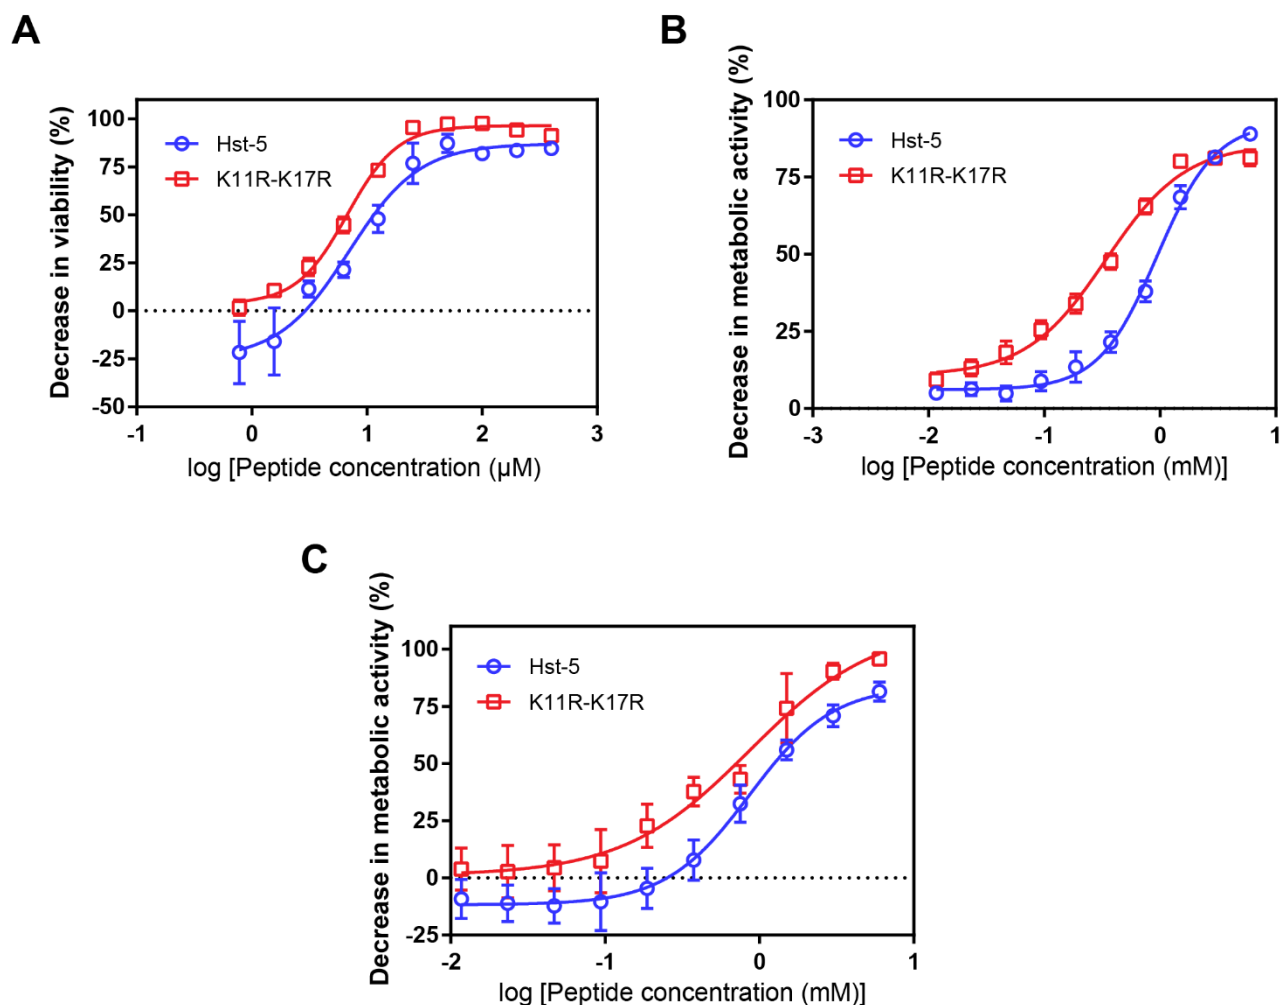

**Supplementary Figure S1.** Model fit to data in (A) Figure 1A (Planktonic), (B) Figure 1B (Biofilm – Preformed), and (C) Figure 2A (Biofilm – Formation). Values of fitted parameters are provided in Table S4, and model details are provided in the methods section.

**Supplementary Table S2.** Results of t-tests to compare data for decrease in viability at each peptide concentration for data in Figure 1A (testing against planktonic cells)

| Peptide concentration ( $\mu\text{M}$ ) | P-value | Discovery <sup>a</sup> |
|-----------------------------------------|---------|------------------------|
| 400                                     | 0.1382  |                        |
| 200                                     | 0.0020  | *                      |
| 100                                     | <0.0001 | *                      |
| 50                                      | 0.0659  |                        |
| 25                                      | 0.1111  |                        |
| 12.5                                    | 0.0090  | *                      |
| 6.25                                    | 0.0022  | *                      |
| 3.125                                   | 0.0935  |                        |
| 1.5625                                  | 0.1645  |                        |
| 0.78125                                 | 0.1948  |                        |

<sup>a</sup> An asterisk marks a P-value low enough to indicate a substantial difference between the peptides with a false discovery rate ( $Q$ ) of 0.05.

**Supplementary Table S3.** Results of t-tests to compare data for decrease in viability at each peptide concentration for data in Figure 1B (testing against preformed biofilms)

| Peptide concentration (mM) | P-value | Discovery <sup>a</sup> |
|----------------------------|---------|------------------------|
| 6                          | 0.0190  | *                      |
| 3                          | 0.8845  |                        |
| 1.5                        | 0.0189  | *                      |
| 0.75                       | 0.0001  | *                      |
| 0.375                      | 0.0001  | *                      |
| 0.1875                     | 0.0058  | *                      |
| 0.09375                    | 0.0031  | *                      |
| 0.046875                   | 0.0132  | *                      |
| 0.0234375                  | 0.0692  |                        |
| 0.0117188                  | 0.1864  |                        |

<sup>a</sup> An asterisk marks a P-value low enough to indicate a substantial difference between the peptides with a false discovery rate ( $Q$ ) of 0.05.

**Supplementary Table S4.** Results of t-tests to compare data for decrease in viability at each peptide concentration for data in Figure 1A (testing for inhibition of biofilm formation)

| Peptide concentration (mM) | P-value | Discovery <sup>a</sup> |
|----------------------------|---------|------------------------|
| 6                          | <0.0001 | *                      |
| 3                          | <0.0001 | *                      |
| 1.5                        | 0.0177  | *                      |
| 0.75                       | 0.0284  | *                      |
| 0.375                      | <0.0001 | *                      |
| 0.1875                     | 0.0004  | *                      |
| 0.09375                    | 0.0438  | *                      |
| 0.046875                   | 0.0086  | *                      |
| 0.0234375                  | 0.0359  | *                      |
| 0.0117188                  | 0.0294  | *                      |

<sup>a</sup> An asterisk marks a P-value low enough to indicate a substantial difference between the peptides with a false discovery rate ( $Q$ ) of 0.05.
